# Supplementary material for: Staphylococcus aureus injection drug use-associated bloodstream infections are propagated by community outbreaks of diverse lineages
Source: PubMed Central journal article supplement (PMC9053277; doi:10.1038/s43856-021-00053-9), 2021-11-30
Supplement: 43856_2021_53_MOESM1_ESM.pdf [file 43856_2021_53_MOESM1_ESM.pdf]

## Description of Additional Supplementary Files

**File Name:** Supplementary Data 1

**Description:** List and nucleotide sequences of putative virulence genes selected *a priori* for genomic analysis

**File Name:** Supplementary Data 2

**Description:** Antimicrobial susceptibility and genomic data.

**File Name:** Supplementary Data 3

**Description:** Antimicrobial susceptibility and genomic data.
