# Supplementary material for: Staphylococcus aureus injection drug use-associated bloodstream infections are propagated by community outbreaks of diverse lineages
Source: PubMed Central journal article supplement (PMC9053277; doi:10.1038/s43856-021-00053-9), 2021-11-30
Supplement: 43856_2021_53_MOESM2_ESM.pdf [file 43856_2021_53_MOESM2_ESM.pdf]

## ***Staphylococcus aureus* injection drug use-associated bloodstream infections are propagated by community outbreaks of diverse lineages**

Laura R. Marks<sup>1\*</sup>, Juan J. Calix<sup>1,2\*</sup>, John A. Wildenthal<sup>1</sup>, Meghan A. Wallace<sup>3</sup>, Sanjam Sawhney<sup>2</sup>, Eric M. Ransom<sup>3</sup>, Michael J. Durkin<sup>1</sup>, Jeffrey P Henderson<sup>1,4,5</sup>, Carey-Ann D. Burnham<sup>3,4#</sup>, and Gautam Dantas<sup>2,3,4,5,#</sup>

### Affiliations:

<sup>1</sup>Division of Infectious Diseases, Washington University in St. Louis School of Medicine. St. Louis, Missouri, United States of America

<sup>2</sup> The Edison Family Center for Genome Sciences and Systems Biology, Washington University School of Medicine, St. Louis, Missouri, United States of America

<sup>3</sup>Department of Pathology and Immunology, Washington University School of Medicine, St. Louis, Missouri, United States of America

<sup>4</sup> Department of Molecular Microbiology, Washington University School of Medicine, St. Louis, Missouri, United States of America

<sup>5</sup>Department of Biomedical Engineering, Washington University, St. Louis, Missouri, United States of America

\* These authors contributed equally: L.R.M, J.J.C

# Corresponding authors: C-A.D.B. (cburnham@wustl.edu); and G.D. (dantas@wustl.edu)

**Supplementary Table 1: Demographics and Clinical Characteristics of all *S. aureus* Blood-stream Isolates at Barnes Jewish Hospital from 1/2016 – 12/2019 by Injection Drug Use Status**

|                                                                         | <b>Non-IDU BSI Cases</b> | <b>IDU-BSI Cases</b> | <b>FDR corrected p value</b> |
|-------------------------------------------------------------------------|--------------------------|----------------------|------------------------------|
|                                                                         | <i>N</i> =1261 (%)       | <i>N</i> = 173 (%)   |                              |
| <b>Demographics</b>                                                     |                          |                      |                              |
| Age (mean years, SD)                                                    | 55±15                    | 39±10                | <0.001                       |
| Female <sup>a</sup>                                                     | 473 (37.5)               | 77 (44.5)            | 0.371                        |
| Discharge AMA                                                           | 18 (1.4)                 | 40 (23.1)            | <0.001                       |
| <b>Coinfections</b>                                                     |                          |                      |                              |
| Hepatitis C Virus Infection                                             | 101 (8.0)                | 119 (68.7)           | <0.001                       |
| HIV infection                                                           | 20 (1.6)                 | 10 (5.8)             | 0.055                        |
| <b>Elixhauser comorbidities</b>                                         |                          |                      |                              |
| No. Elixhauser Comorbidities (Mean, SD)                                 | 8.9 (3.6)                | 8.8 (3.7)            | 0.499                        |
| AIDS and HIV                                                            | 20 (1.6)                 | 10 (5.8)             | 0.011                        |
| Alcohol Abuse                                                           | 134 (10.6)               | 26 (15.0)            | 0.148                        |
| Rheumatoid Arthritis, Collagen Vascular Disease                         | 119 (9.4)                | 15 (8.7)             | 0.772                        |
| Blood loss anemia                                                       | 82 (6.5)                 | 10 (5.8)             | 0.775                        |
| Congestive heart failure                                                | 536 (42.5)               | 51 (29.5)            | 0.002                        |
| Coagulopathy                                                            | 605 (48)                 | 81)                  | 0.775                        |
| Chronic Pulmonary Disorder                                              | 451 (35.8)               | 64 (37.0)            | 0.771                        |
| Drug Abuse                                                              | 169 (13.4)               | 149 (86.1)           | 0.415                        |
| Depression                                                              | 506 (40.1)               | 72 (41.6)            | 0.768                        |
| Diabetes, uncomplicated                                                 | 412 (32.7)               | 23 (13.3)            | <0.001                       |
| Diabetes, complicated                                                   | 538 (42.7)               | 18 (10.4)            | <0.001                       |
| Fluid and electrolyte disorder                                          | 1061 (84.1)              | 143 (82.7)           | 0.751                        |
| Hypertension                                                            | 995 (78.9)               | 86 (49.7)            | <0.001                       |
| Hypothyroidism                                                          | 227 (18.0)               | 10 (5.8)             | <0.001                       |
| Liver disease                                                           | 308 (24.4)               | 71 (41.0)            | <0.001                       |
| Lymphoma                                                                | 96 (7.6)                 | 2 (1.2)              | <0.001                       |
| Metastatic Cancer                                                       | 162 (12.8)               | 6 (3.5)              | <0.001                       |
| Other Neurologic Disorders                                              | 441 (35.0)               | 51 (29.5)            | 0.216                        |
| Obesity                                                                 | 447 (35.4)               | 21 (12.1)            | <0.001                       |
| Paralysis                                                               | 227 (18.0)               | 27 (15.6)            | 0.546                        |
| Peripheral Vascular Disorders                                           | 487 (38.6)               | 83 (48.0)            | 0.031                        |
| Pulmonary Circulation Disorders                                         | 204 (16.2)               | 92 (53.2)            | <0.001                       |
| Psychoses                                                               | 129 (10.2)               | 38 (22.0)            | <0.001                       |
| Renal Failure                                                           | 576 (45.7)               | 55 (31.8)            | <0.001                       |
| Solid Tumor, without metastases                                         | 234 (18.6)               | 8 (4.6)              | <0.001                       |
| Weight Loss                                                             | 601 (47.7)               | 59 (34.1)            | 0.001                        |
| <b><i>S. aureus</i> Clinical Infection Characteristics and Outcomes</b> |                          |                      |                              |
| Infective endocarditis                                                  | 400 (32.8)               | 106 (58.4)           | <0.001                       |

|                                        |            |           |        |
|----------------------------------------|------------|-----------|--------|
| Osteomyelitis                          | 261 (20.7) | 34 (19.6) | 0.249  |
| Septic Arthritis                       | 86 (6.8)   | 27 (15.6) | <0.001 |
| Necrotizing SSTI                       | 36 (2.8)   | 24 (13.9) | <0.001 |
| CLABSI                                 | 84 (6.7)   | 1 (0.6)   | 0.004  |
| Duration of Bacteremia (mean days, SE) | 2.5±0.3    | 3.8±0.4   | <0.001 |
| Prolonged Bacteremia (>5 days)         | 148 (11.7) | 53 (30.6) | <0.001 |
| Methicillin Resistance                 | 743 (58.9) | 97 (56.1) | 0.728  |
| 1-year Mortality                       | 409 (32.4) | 27 (15.6) | <0.001 |

<sup>a</sup>Unless otherwise specified, all values are n (%)

AMA, against medical advice; CLABSI, central line-associated bacteremia; HIV, human immunodeficiency virus; IDU, injection drug use; MRSA, methicillin resistant Staphylococcus aureus; PWID, person who injects drugs; SD standard deviation; SE, standard error; SSTI, Skin/soft tissue infection.

**Supplementary Table 2: Factors Associated with 1-year Mortality for *S. aureus* Blood-stream Infections**

| Variable                                                         | Univariate Analysis   |         | Multivariable Analysis                    |         |
|------------------------------------------------------------------|-----------------------|---------|-------------------------------------------|---------|
|                                                                  | Hazard Ratio (95% CI) | P value | Hazard Ratio (95% CI)                     | P value |
| <b>Demographics</b>                                              |                       |         |                                           |         |
| Age                                                              | 1.020 (1.01 - 1.03)   | <0.001  | 1.029 (1.02 - 1.04)                       | <0.001  |
| Female                                                           | 1.21 (0.99 - 1.47)    | 0.051   | 1.32 (1.02 - 1.68)                        | 0.021   |
| <b>S. aureus Clinical Infection Characteristics and Outcomes</b> |                       |         |                                           |         |
| Methicillin Resistant Staphylococcus aureus                      | 1.197 (0.97 - 1.43)   | 0.105   |                                           |         |
| Bacteremia 5+ Days                                               | 0.99 (0.73 - 1.34)    | 0.951   |                                           |         |
| Endocarditis                                                     | 1.27 (0.89 - 1.79)    | 0.176   |                                           |         |
| Injection Drug Use Associated                                    | 0.63 (0.40 - 0.98)    | 0.047   | 0.78 (0.62 - 0.98)                        | 0.04    |
| <b>Elixhauser comorbidities</b>                                  |                       |         |                                           |         |
| AIDS and HIV                                                     | 0.83 (0.32 - 2.17)    | 0.706   |                                           |         |
| Alcohol Abuse                                                    | 1.16 (0.78 - 1.74)    | 0.465   |                                           |         |
| Blood loss anemia                                                | 1.25 (0.88 - 1.78)    | 0.221   |                                           |         |
| Coagulopathy                                                     | 1.53 (1.23 - 1.91)    | <0.001  | 1.63 (1.24 - 2.15)                        | <0.001  |
| Congestive heart failure                                         | 1.21 (0.97 - 1.49)    | 0.086   | 1.03 (0.77 - 1.35)                        | 0.011   |
| Chronic Pulmonary Disorder                                       | 1.15 (0.088 - 1.49)   | 0.309   |                                           |         |
| Depression                                                       | 0.78 (0.59 - 1.01)    | 0.057   | 0.80 (0.63 - 1.03)                        | 0.085   |
| Diabetes, uncomplicated                                          | 1.01 (0.73 - 1.39)    | 0.942   |                                           |         |
| Diabetes, complicated                                            | 0.94 (0.68 - 1.29)    | 0.700   |                                           |         |
| Drug Abuse                                                       | 0.68 (0.56 - 0.88)    | 0.002   | *not included, duplicates PWID data-point |         |
| Hypertension                                                     | 1.08 (0.77 - 1.50)    | 0.677   |                                           |         |
| Hypothyroidism                                                   | 1.45 (1.05 - 1.98)    | 0.023   | 1.25 (0.88 - 1.74)                        | 0.204   |
| Fluid and electrolyte disorder                                   | 3.02 (1.94 - 4.73)    | <0.001  | 2.50 (1.65 - 3.79)                        | <0.001  |
| Lymphoma                                                         | 0.90 (0.62 - 1.30)    | 0.578   |                                           |         |
| Liver disease                                                    | 1.14 (0.85 - 1.52)    | 0.390   |                                           |         |
| Metastatic Cancer                                                | 1.32 (0.93 - 1.88)    | 0.126   |                                           |         |
| Other Neurologic Disorders                                       | 1.32 (0.93 - 1.88)    | 0.126   |                                           |         |
| Obesity                                                          | 0.84 (0.64 - 1.10)    | 0.209   |                                           |         |
| Paralysis                                                        | 1.21 (0.88 - 1.65)    | 0.244   |                                           |         |
| Peripheral Vascular Disorders                                    | 1.10 (0.85 - 1.43)    | 0.471   |                                           |         |
| Pulmonary Circulation Disorders                                  | 0.831 (0.60 - 1.15)   | 0.264   |                                           |         |
| Psychoses                                                        | 0.62 (0.48 - 0.93)    | 0.021   | 0.45 (0.29 - 0.69)                        | <0.001  |
| Renal Failure                                                    | 1.03 (0.83 - 1.28)    | 0.786   |                                           |         |
| Solid Tumor, without metastases                                  | 1.33 (1.01 - 1.71)    | 0.061   | 1.78 (1.31 - 2.39)                        | <0.001  |
| Weight Loss                                                      | 1.22 (0.98 - 1.50)    | 0.069   | 1.37 (1.08 - 1.75)                        | 0.010   |

**Supplementary Table 3: *S. aureus* multilocus Sequence type group composition according to Blood-stream Infection subtypes**

|                          | IDU-BSI    | non-IDU BSI |           | Total      | OR [CI95%]         |                   |                   |                    |
|--------------------------|------------|-------------|-----------|------------|--------------------|-------------------|-------------------|--------------------|
|                          |            | CLABSI      | cBSI      |            | IDU-BSI vs other   | CLABSI vs other   | cBSI vs other     | IDU-BSI vs cBSI    |
| <b>ST8/1181</b>          | 69         | 9           | 18        | 96         | 1.86 [1.03-3.38]   | 0.46 [0.18-1.07]  | 0.74 [0.37-1.45]  | 1.57 [0.79-3.23]   |
| <b>ST5/840</b>           | 19         | 4           | 13        | 36         | 0.60 [0.27-1.31]   | 0.68 [0.16-2.13]  | 2.35 [1.00-5.34]  | 0.44 [0.18-1.05]   |
| <b>ST398/4163</b>        | 14         | 5           | 1         | 20         | 1.38 [0.48-4.56]   | 2.06 [0.55-6.52]  | 0.14 [0.003-0.91] | 5.17 [0.75-223.83] |
| <b>ST15/582</b>          | 12         | 1           | 2         | 15         | 2.41 [0.63-13.71]  | 0.39 [0.01-2.76]  | 0.54 [0.06-2.48]  | 2.15 [0.45-20.42]  |
| <b>ST72</b>              | 5          | 2           | 6         | 13         | 0.34 [0.08-1.23]   | 1.05 [0.11-5.13]  | 3.32 [0.88-3.32]  | 0.27 [0.06-1.09]   |
| <b>ST45/256/536</b>      | 7          | 3           | 1         | 11         | 1.01 [0.25-4.85]   | 2.25 [0.37-10.01] | 0.35 [0.01-2.45]  | 2.47 [0.31-113.66] |
| <b>ST87/59</b>           | 6          | 2           | 2         | 10         | 0.86 [0.20-4.27]   | 1.46 [0.15-7.77]  | 0.71 [0.07-3.47]  | 1.03 [0.18-10.79]  |
| <b>ST30/39</b>           | 3          | 3           | 3         | 9          | 0.28 [0.04-1.33]   | 3.03 [0.47-15.01] | 1.83 [0.29--8.96] | 0.33 [0.04-2.57]   |
| <b>ST97</b>              | 6          | 2           | 1         | 9          | 1.16 [0.24-7.36]   | 1.68 [0.16-9.32]  | 0.91 [0.02-7.29]  | 2.10 [0.25-98.77]  |
| <b>ST188</b>             | 4          | 1           | 0         | 5          | 2.34 [0.23-116.80] | 1.45 [0.03-15.19] | N/A               | N/A                |
| <b>OTHER<sup>1</sup></b> | 9          | 4           | 6         | 19         | 0.49 [0.17-1.41]   | 1.59 [0.36-5.45]  | 1.73 [0.51-5.21]  | 0.49 [0.15-1.76]   |
| <b>TOTAL</b>             | <b>154</b> | <b>36</b>   | <b>53</b> | <b>243</b> |                    |                   |                   |                    |

<sup>1</sup>Includes singleton isolates and STs 672, 6, 20, 27, 1 and 1159

CLABSI, central line-associated bacteremia; cBSI, conventional blood-stream infection; IDU-BSI, injection drug use associated blood-stream infection;
